# Supplementary material
Source: PubMed Central journal article supplement (PMC4780261)
Supplement: NIHMS751410-supplement-Author_approval_statements.pdf [file NIHMS751410-supplement-Author_approval_statements.pdf]

**Subject:** RE: CIRCCVIM/2015/003754R2

**Date:** Monday, December 14, 2015 1:23:55 PM Eastern Standard Time

**From:** aguilarfg

**To:** Sanjiv J Shah

Dear Sanjiv,

As a co-author on CIRCCVIM/2015/003754R2 ("Prognostic Utility and Clinical Significance of Cardiac Mechanics in Heart Failure with Preserved Ejection Fraction: Importance of Left Atrial Strain"), I agree with the addition of the following co-authors to this paper:

Jeanette Cheng  
Abigail Baldrige  
Laura Rasmussen-Torvik

Sincerely,

Frank G Aguilar

**Subject:** RE: CIRCCVIM/2015/003754R2

**Date:** Monday, December 14, 2015 12:08:20 PM Eastern Standard Time

**From:** Lauren Nelson

**To:** Sanjiv J Shah

Dear Sanjiv,

As a co-author on CIRCCVIM/2015/003754R2 ("Prognostic Utility and Clinical Significance of Cardiac Mechanics in Heart Failure with Preserved Ejection Fraction: Importance of Left Atrial Strain"), I agree with the addition of the following co-authors to this paper:

Jeanette Cheng  
Abigail Baldrige  
Laura Rasmussen-Torvik

Sincerely,

Lauren Beussink-Nelson

Lauren Beussink-Nelson, MS, RDCS, FASE  
*Research Sonographer*  
*Technical Director, Northwestern Echocardiography Core Laboratory*  
Northwestern University  
201 E Huron, Suite 11-240  
Chicago, IL 60611  
Phone: (312) 926-7065  
Email: [lauren.nelson@northwestern.edu](mailto:lauren.nelson@northwestern.edu)

**Subject:** RE: CIRCCVIM/2015/003754R2

**Date:** Monday, December 14, 2015 2:03:30 PM Eastern Standard Time

**From:** Vistasp Daruwalla

**To:** Sanjiv J Shah

Dear Sanjiv,

As a co-author on CIRCCVIM/2015/003754R2 ("Prognostic Utility and Clinical Significance of Cardiac Mechanics in Heart Failure with Preserved Ejection Fraction: Importance of Left Atrial Strain"), I agree with the addition of the following co-authors to this paper:

Jeanette Cheng  
Abigail Baldrige  
Laura Rasmussen-Torvik

Sincerely,

**Subject:** CIRCCVIM/2015/003754R2

**Date:** Monday, December 14, 2015 10:08:56 PM Eastern Standard Time

**From:** Debra Dixon

**To:** Sanjiv J Shah

Dear Sanjiv,

As a co-author on CIRCCVIM/2015/003754R2 ("Prognostic Utility and Clinical Significance of Cardiac Mechanics in Heart Failure with Preserved Ejection Fraction: Importance of Left Atrial Strain"), I agree with the addition of the following co-authors to this paper:

Jeanette Cheng  
Abigail Baldrige  
Laura Rasmussen-Torvik

Sincerely,

Debra Dixon

**Subject:** CIRCCVIM/2015/003754R2

**Date:** Monday, December 14, 2015 1:11:59 PM Eastern Standard Time

**From:** Freed, Benjamin

**To:** Sanjiv J Shah

Dear Sanjiv,

As a co-author on CIRCCVIM/2015/003754R2 ("Prognostic Utility and Clinical Significant of Cardiac Mechanics in Heart Failure with Preserved Ejection Fraction: Importance of Left Atrial Strain"), I agree with the addition of the following co-authors to this paper:

Jeanette Cheng  
Abigail Baldrige  
Laura Rasmussen-Torvik

Sincerely,  
Ben Freed

Benjamin H. Freed, MD, FACC  
Division of Cardiology  
Northwestern Memorial Hospital  
676 North St. Clair Suite 600  
Chicago, Illinois 60611  
(312) 926-2398

**Subject:** RE: CIRCCVIM/2015/003754R2

**Date:** Monday, December 14, 2015 10:03:44 AM Eastern Standard Time

**From:** David Alan Klein

**To:** Sanjiv J Shah

Dear Sanjiv,

As a co-author on CIRCCVIM/2015/003754R2 ("Prognostic Utility and Clinical Significance of Cardiac Mechanics in Heart Failure with Preserved Ejection Fraction: Importance of Left Atrial Strain"), I agree with the addition of the following co-authors to this paper:

Jeanette Cheng

Abigail Baldrige

Laura Rasmussen-Torvik

Sincerely,

David A Klein

**Subject:** Re: CIRCCVIM/2015/003754R2

**Date:** Monday, December 14, 2015 11:25:16 AM Eastern Standard Time

**From:** Maganti, Kameswari

**To:** Sanjiv J Shah

Dear Sanjiv,

As a co-author on CIRCCVIM/2015/003754R2 ("Prognostic Utility and Clinical Significance of Cardiac Mechanics in Heart Failure with Preserved Ejection Fraction: Importance of Left Atrial Strain"), I agree with the addition of the following co-authors to this paper:

Jeanette Cheng  
Abigail Baldrige  
Laura Rasmussen-Torvik

Sincerely,

Kamu

Kameswari Maganti, MD, FACC, FASE  
Associate Professor of Medicine,  
Director of Cardiac Rehabilitation,  
Feinberg Pavilion, Suite 8-503G  
201 E. Huron Street  
Chicago, IL 60611  
Email: k-maganti@northwestern.edu  
Tel: 312-695-0058  
Fax: 312-695-0047  
Administrative Assistant: Amy Acevedo-Carrasco  
Tel: 312-695-0788

**Subject:** RE: CIRCCVIM/2015/003754R2

**Date:** Tuesday, December 15, 2015 12:58:00 PM Eastern Standard Time

**From:** Andrew Choi

**To:** Sanjiv J Shah

Dear Sanjiv,

As a co-author on CIRCCVIM/2015/003754R2 ("Prognostic Utility and Clinical Significance of Cardiac Mechanics in Heart Failure with Preserved Ejection Fraction: Importance of Left Atrial Strain"), I agree with the addition of the following co-authors to this paper:

Jeanette Cheng  
Abigail Baldrige  
Laura Rasmussen-Torvik

Sincerely,  
Andrew W. Choi
